# Supplementary material
Source: publisher figshare collection journal article supplement (https://gsajournals.figshare.com/ndownloader/files/25833983)
Supplement: Supplementary file 1 [file 25833983]

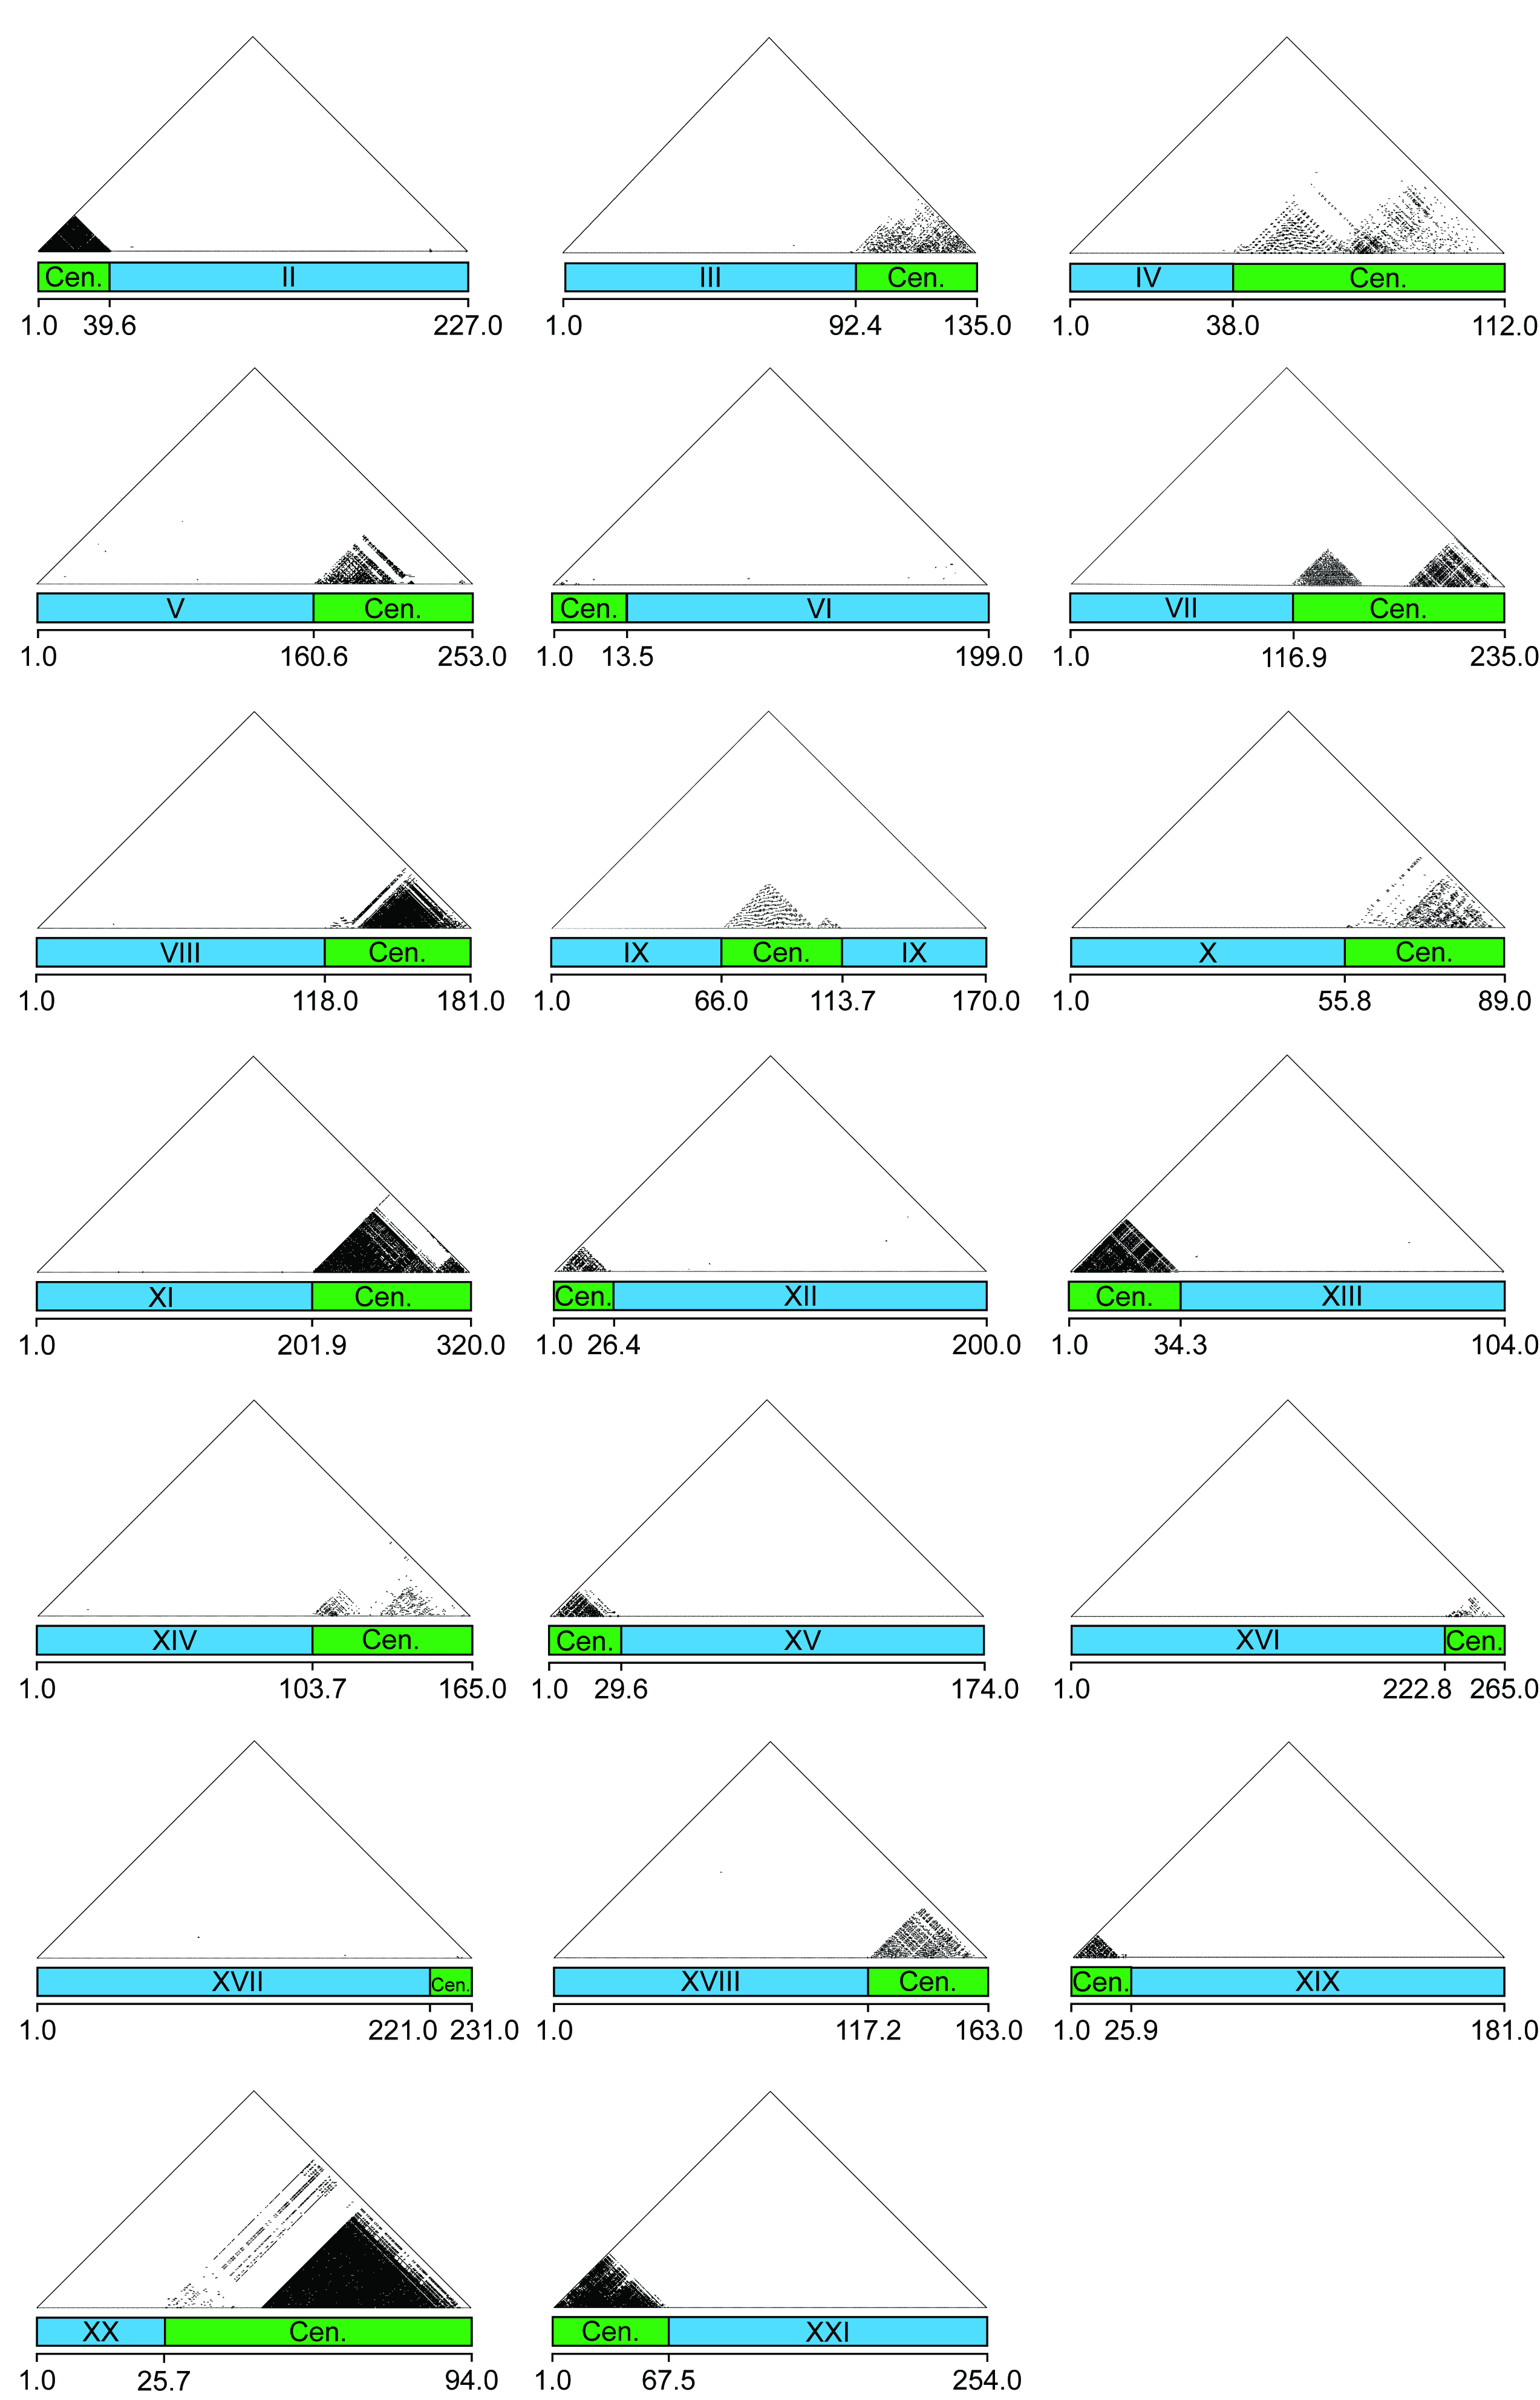


**Figure S9.** Centromeres display higher order repeat structure. Sequence identity between repeats is depicted by black dots matching windows of 180 bp with 100% sequence identity. The blue region denotes the end of a chromosome with unique sequence. The green region is the newly aligned centromere contig and positions are shown in kb.
